# Supplementary material
Source: publisher figshare collection journal article supplement (https://gsajournals.figshare.com/articles/dataset/_/7318505)
Supplement: Supplementary file 1 [file 1]

## Sheet: HopZ1a
Table S6. Congruence scores for yeast genes with genetic interaction profiles similar to that of HopX1.
Effector	Congruent Genes	Congruent Score
HopX1	SLA1	8.75
HopX1	YNL086W	8.62
HopX1	DID4	8.18
HopX1	YJR120W	7.82
HopX1	SHE4	7.62
HopX1	RIM20	7.27
HopX1	PBP1	6.93
HopX1	EXG1	6.93
HopX1	RAV2	6.59
HopX1	GIM5	6.57
HopX1	ATP18	6.21
HopX1	CYK3	6.21
HopX1	GPI16_damp	6.18
HopX1	YPI1_damp	6.08
HopX1	MRH1	6.01
HopX1	mps1-417	5.69
HopX1	MNN11	5.46
HopX1	SOR2	5.2
HopX1	AIM33	5.11
HopX1	RPN13	5.11
HopX1	DFG16	5.1
HopX1	YKL061W	5.08
HopX1	PMP3	5.03
HopX1	ELP6	4.95
HopX1	TPS3	4.95
HopX1	VPS36	4.95
HopX1	YKE2	4.93
HopX1	GPR1	4.83
HopX1	HRR25_damp	4.83
HopX1	VPS28	4.76
HopX1	LSC2	4.73
HopX1	PTP3	4.69
HopX1	SPS2	4.69
HopX1	YDR124W	4.65
HopX1	PET20	4.57
HopX1	VID28	4.57
HopX1	cop1-1	4.54
HopX1	RPC19_damp	4.52
HopX1	CLA4	4.52
HopX1	TOF2	4.49
HopX1	VIK1	4.48
HopX1	GDS1	4.44
HopX1	tap42-11	4.4
HopX1	CSM2	4.39
HopX1	ARC18	4.38
HopX1	DTR1	4.37
HopX1	arc15-10	4.37
HopX1	ERV41	4.37
HopX1	act1-136	4.35
HopX1	BIT61	4.35
HopX1	KIN2	4.35
HopX1	MRPL50	4.34
HopX1	DIS3_damp	4.23
HopX1	HNM1	4.23
HopX1	PXA1	4.23
HopX1	VPS72	4.22
HopX1	YBR238C	4.19
HopX1	SIN4	4.18
HopX1	ERP5	4.17
HopX1	SAS4	4.15
HopX1	SHP1	4.13
HopX1	HOL1	4.11
HopX1	HST3	4.11
HopX1	tcp1-2	4.08
HopX1	RSB1	4.07
HopX1	CYS3	4.07
HopX1	LAS21	4.01
HopX1	GLE2	4.01
HopX1	YKR104W	4.01
HopX1	ERV46	4
HopX1	PTC2	3.96
HopX1	TRP2	3.95
HopX1	YEL057C	3.93
HopX1	act1-129	3.92
HopX1	SRP40	3.9
HopX1	SPO12	3.9
HopX1	KIP2	3.88
HopX1	BBC1	3.86
HopX1	RUD3	3.84
HopX1	VPS29	3.83
HopX1	AEP2	3.83
HopX1	FET4	3.78
HopX1	GCN5	3.78
HopX1	ABP1	3.76
HopX1	NCE101	3.74
HopX1	IZH1	3.74
HopX1	RPG1_damp	3.73
HopX1	VPS4	3.72
HopX1	SGF11	3.72
HopX1	VMA5	3.7
HopX1	taf8-7	3.69
HopX1	cdc10-4	3.69
HopX1	act1-120	3.67
HopX1	cmd1-8	3.67
HopX1	GIC2	3.67
HopX1	TPO5	3.64
HopX1	RBL2	3.64
HopX1	CHL4	3.62
HopX1	UBP6	3.61
HopX1	EGD1	3.59
HopX1	VHS1	3.56
HopX1	SCD5_damp	3.55
HopX1	act1-125	3.54
HopX1	RPL13A	3.53
HopX1	SLX1	3.53
HopX1	SPO71	3.51
HopX1	GYP6	3.5
HopX1	HAL5	3.5
HopX1	VPS27	3.47
HopX1	DCR2	3.45
HopX1	ATG8	3.42
HopX1	POX1	3.42
HopX1	HOC1	3.41
HopX1	HAP3	3.4
HopX1	HEM13_damp	3.39
HopX1	PTK1	3.39
HopX1	SWI4	3.37
HopX1	BZZ1	3.35
HopX1	THI72	3.35
HopX1	TMA17	3.35
HopX1	ERD1	3.33
HopX1	RPI1	3.31
HopX1	VPS3	3.31
HopX1	SEC66	3.31
HopX1	SWC3	3.29
HopX1	SVF1	3.28
HopX1	SUS1	3.26
HopX1	MET6	3.25
HopX1	AIM45	3.24
HopX1	cdc7-4	3.24
HopX1	PMC1	3.21
HopX1	LYS20	3.21
HopX1	JEN1	3.21
HopX1	URM1	3.17
HopX1	OCA2	3.17
HopX1	SIN3	3.16
HopX1	SPR3	3.16
HopX1	FLO9	3.15
HopX1	LGE1	3.14
HopX1	SCS3	3.14
HopX1	TIR4	3.11
HopX1	MUS81	3.11
HopX1	GCR2	3.09
HopX1	SHS1	3.09
HopX1	PUS5	3.08
HopX1	YBR141C	3.05
HopX1	PDR17	3.05
HopX1	SIP3	3.05
HopX1	PHO5	3.04
HopX1	CUP5	3.04
HopX1	DIA2	3.02
HopX1	RPL23A	3.02
HopX1	BSP1	3.02
HopX1	SLT2	2.99
HopX1	YNL313C_damp	2.99
HopX1	MID2	2.99
HopX1	SYM1	2.99
HopX1	PEX12	2.97
HopX1	CPR8	2.97
HopX1	RAP1_damp	2.95
HopX1	YPL109C	2.93
HopX1	CSF1	2.93
HopX1	PSD1	2.93
HopX1	CAB1_damp	2.91
HopX1	VAM6	2.91
HopX1	PHO90	2.89
HopX1	RTT101	2.89
HopX1	CSI1	2.89
HopX1	ERG12_damp	2.89
HopX1	YOR114W	2.89
HopX1	SRB2	2.88
HopX1	PGM2	2.87
HopX1	GID8	2.87
HopX1	ssl1-T242I	2.85
HopX1	YTA7	2.85
HopX1	PFS1	2.85
HopX1	YKR075C	2.85
HopX1	MST27	2.84
HopX1	QDR1	2.84
HopX1	BRE1	2.84
HopX1	cdc48-3	2.83
HopX1	RPT2_damp	2.83
HopX1	PEP12	2.82
HopX1	CPR7	2.82
HopX1	RAD57	2.82
HopX1	EFT2	2.82
HopX1	YOL092W	2.82
HopX1	CLP1_damp	2.8
HopX1	YOR246C	2.79
HopX1	HAL9	2.79
HopX1	RMD1	2.78
HopX1	MED1	2.77
HopX1	NOP16	2.75
HopX1	YKL171W	2.75
HopX1	UBP3	2.75
HopX1	HOM6	2.75
HopX1	GET2	2.74
HopX1	RPS30A	2.74
HopX1	RPN10	2.74
HopX1	GGA2	2.74
HopX1	MCT1	2.74
HopX1	GLR1	2.74
HopX1	BRE2	2.74
HopX1	CCZ1	2.72
HopX1	VAM3	2.71
HopX1	RAD6	2.71
HopX1	YJL068C	2.71
HopX1	TOF1	2.71
HopX1	ERV15	2.71
HopX1	RIM9	2.69
HopX1	IKI1	2.67
HopX1	ECM29	2.67
HopX1	DLD2	2.67
HopX1	RIM13	2.64
HopX1	YLR152C	2.64
HopX1	CYC8	2.63
HopX1	IRC15	2.62
HopX1	KAR3	2.62
HopX1	SSD1	2.61
HopX1	IES2	2.61
HopX1	met30-9	2.61
HopX1	UBC7	2.6
HopX1	QCR6	2.6
HopX1	SKI3	2.58
HopX1	URA8	2.56
HopX1	RPL14B	2.56
HopX1	GDE1	2.55
HopX1	ELP2	2.54
HopX1	PCS60	2.52
HopX1	SWD1	2.5
HopX1	CDC73	2.49
HopX1	PTH2	2.49
HopX1	MMS1	2.49
HopX1	BIK1	2.49
HopX1	YJR003C	2.49
HopX1	PCL1	2.49
HopX1	ATP12	2.47
HopX1	TSC13_damp	2.47
HopX1	ELM1	2.47
HopX1	RIM8	2.45
HopX1	cdc12-1	2.45
HopX1	NIP100	2.45
HopX1	ARP6	2.44
HopX1	YND1	2.41
HopX1	ASM4	2.41
HopX1	BCK1	2.41
HopX1	RCO1	2.41
HopX1	SWP1_damp	2.4
HopX1	IRA2	2.4
HopX1	TMS1	2.39
HopX1	EMI1	2.39
HopX1	DIM1_damp	2.39
HopX1	RPP2B	2.39
HopX1	ASI1	2.39
HopX1	KAP123_damp	2.39
HopX1	VPH1	2.39
HopX1	PUS9	2.36
HopX1	GRX2	2.36
HopX1	TPO4	2.36
HopX1	cdc28-13	2.36
HopX1	GIN4	2.36
HopX1	POL32	2.35
HopX1	FAR10	2.34
HopX1	sec61-2	2.34
HopX1	RAX2	2.33
HopX1	LRS4	2.33
HopX1	KIN82	2.3
HopX1	NUP120	2.3
HopX1	EDE1	2.3
HopX1	PEX5	2.3
HopX1	act1-112	2.3
HopX1	MRE11	2.3
HopX1	KIN4	2.3
HopX1	GLC7_damp	2.29
HopX1	arc35-5	2.28
HopX1	EST3	2.27
HopX1	RPL26B	2.27
HopX1	UBS1	2.27
HopX1	GCN2	2.26
HopX1	ASE1	2.26
HopX1	SLX9	2.26
HopX1	GLC3	2.25
HopX1	FET3	2.25
HopX1	YPR078C	2.25
HopX1	PRE9	2.24
HopX1	RAD51	2.24
HopX1	CHO2	2.22
HopX1	KTR3	2.22
HopX1	KTR6	2.22
HopX1	RMA1	2.22
HopX1	HXK2	2.22
HopX1	MMS22	2.22
HopX1	VMA13	2.21
HopX1	cdc11-2	2.19
HopX1	MUQ1	2.19
HopX1	ASP3-4	2.19
HopX1	TRI1	2.19
HopX1	APM3	2.18
HopX1	HAC1	2.18
HopX1	PRB1	2.18
HopX1	TCO89	2.16
HopX1	ENT5	2.15
HopX1	BAP2	2.14
HopX1	MET14	2.14
HopX1	YPK9	2.14
HopX1	PHO12	2.13
HopX1	HCR1	2.12
HopX1	ARF1	2.12
HopX1	DEG1	2.11
HopX1	UBP14	2.11
HopX1	LDB18	2.1
HopX1	JID1	2.1
HopX1	YDL133W	2.1
HopX1	SOL4	2.09
HopX1	HAP2	2.09
HopX1	GSG1	2.08
HopX1	BCY1	2.08
HopX1	cdc24-11	2.07
HopX1	HXK1	2.07
HopX1	SSA2	2.07
HopX1	tor2-21	2.07
HopX1	MED2	2.07
HopX1	VPS13	2.07
HopX1	BEM1	2.07
HopX1	DGK1	2.06
HopX1	HSP30	2.05
HopX1	IMD3	2.05
HopX1	RAD50	2.05
HopX1	GIM4	2.04
HopX1	HTA2	2.03
HopX1	TPK1	2.03
HopX1	UIP5	2.03
HopX1	APM4	2.03
HopX1	PET127	2.03
HopX1	RPF1_damp	2.02
HopX1	ERS1	2.02
HopX1	EDS1	2.02
HopX1	YNL010W	2.02
HopX1	gpi8-ts	2
